# Supplementary material for: Distribution of β-Lactamase Genes in Clinical Isolates from California Central Valley Hospital Deviates from the United States Nationwide Trends
Source: MDPI journal article supplement (doi:10.3390/antibiotics10050498), 2021-04-27
Supplement: s1 [file s1]

## Supplementary File

**Table S1.** Pairwise yearly frequency comparison for *bla<sub>SHV</sub>* in the DHMMC database. The first two columns show the years whose frequencies are being compared. The third column shows the frequency difference, and the last column shows the *p*-value associated with the frequency difference.

| Y1   | Y2   | FY1-FY2 | <i>p</i> -value |
|------|------|---------|-----------------|
| 2013 | 2014 | 1.5     | 7.17e-01        |
| 2013 | 2015 | 2.0     | 5.28e-01        |
| 2013 | 2016 | -3.1    | 4.12e-01        |
| 2013 | 2017 | -0.1    | 9.81e-01        |
| 2013 | 2018 | -3.9    | 3.89e-01        |
| 2014 | 2015 | 0.5     | 8.78e-01        |
| 2014 | 2016 | -4.6    | 2.51e-01        |
| 2014 | 2017 | -1.6    | 6.91e-01        |
| 2014 | 2018 | -5.4    | 2.45e-01        |
| 2015 | 2016 | -5.1    | 6.55e-02        |
| 2015 | 2017 | -2.1    | 4.86e-01        |
| 2015 | 2018 | -5.9    | 9.34e-02        |
| 2016 | 2017 | 3.0     | 3.98e-01        |
| 2016 | 2018 | -0.8    | 8.55e-01        |
| 2017 | 2018 | -3.8    | 3.80e-01        |

**Table S2.** Pairwise yearly frequency comparison for *bla<sub>TEM</sub>* in the DHMMC database. The first two columns show the years whose frequencies are being compared. The third column shows the frequency difference, and the last column shows the *p*-value associated with the frequency difference.

| Y1   | Y2   | FY1-FY2 | <i>p</i> -value |
|------|------|---------|-----------------|
| 2013 | 2014 | 8.2     | 2.31e-01        |
| 2013 | 2015 | 7.9     | 1.42e-01        |
| 2013 | 2016 | 13.1    | 1.57e-02        |
| 2013 | 2017 | 13.9    | 2.13e-02        |
| 2013 | 2018 | 8.8     | 1.92e-01        |
| 2014 | 2015 | -0.3    | 9.64e-01        |
| 2014 | 2016 | 4.9     | 3.80e-01        |
| 2014 | 2017 | 5.7     | 3.48e-01        |
| 2014 | 2018 | 0.7     | 9.23e-01        |
| 2015 | 2016 | 5.2     | 2.16e-01        |
| 2015 | 2017 | 6.0     | 2.19e-01        |
| 2015 | 2018 | 0.9     | 8.70e-01        |
| 2016 | 2017 | 0.8     | 8.64e-01        |
| 2016 | 2018 | -4.3    | 4.42e-01        |
| 2017 | 2018 | -5.1    | 4.01e-01        |

**Table S3.** Pairwise yearly frequency comparison for *bla<sub>CTX-M</sub>* in the DHMMC database. The first two columns show the years whose frequencies are being compared. The third column shows the frequency difference, and the last column shows the *p*-value associated with the frequency difference. The asterisk (\*) indicate a statistically significant comparison after the False Discovery Rate controlling procedure ( $q^*=0.025$ ).

| Y1   | Y2   | FY1-FY2 | <i>p</i> -value |
|------|------|---------|-----------------|
| 2013 | 2014 | -22.2   | 1.46e-03*       |
| 2013 | 2015 | -18.5   | 7.11e-04*       |
| 2013 | 2016 | -10.0   | 8.91e-02        |

|      |      |       |          |
|------|------|-------|----------|
| 2013 | 2017 | -8.3  | 2.04e-01 |
| 2013 | 2018 | -10.5 | 1.38e-01 |
| 2014 | 2015 | 3.6   | 5.12e-01 |
| 2014 | 2016 | 12.2  | 4.24e-02 |
| 2014 | 2017 | 13.9  | 3.37e-02 |
| 2014 | 2018 | 11.7  | 9.21e-02 |
| 2015 | 2016 | 8.6   | 5.04e-02 |
| 2015 | 2017 | 10.3  | 4.34e-02 |
| 2015 | 2018 | 8.0   | 1.55e-01 |
| 2016 | 2017 | 1.7   | 7.58e-01 |
| 2016 | 2018 | -0.5  | 9.31e-01 |
| 2017 | 2018 | -2.2  | 7.40e-01 |

**Table S4.** Pairwise yearly frequency comparison for *bla<sub>OXA</sub>* in the DHMMC database. The first two columns show the years whose frequencies are being compared. The third column shows the frequency difference, and the last column shows the *p*-value associated with the frequency difference. The asterisk (\*) indicate a statistically significant comparison after the False Discovery Rate controlling procedure ( $q^*=0.025$ ).

| Y1   | Y2   | FY1-FY2 | <i>p</i> -value |
|------|------|---------|-----------------|
| 2013 | 2014 | -1.7    | 8.11e-01        |
| 2013 | 2015 | 3.0     | 6.00e-01        |
| 2013 | 2016 | 17.1    | 3.70e-03*       |
| 2013 | 2017 | 16.3    | 1.26e-02        |
| 2013 | 2018 | 15.1    | 3.51e-02        |
| 2014 | 2015 | 4.7     | 4.43e-01        |
| 2014 | 2016 | 18.8    | 2.71e-03*       |
| 2014 | 2017 | 18.0    | 8.89e-03*       |
| 2014 | 2018 | 16.8    | 2.48e-02        |
| 2015 | 2016 | 14.1    | 2.44e-03*       |
| 2015 | 2017 | 13.3    | 1.42e-02        |
| 2015 | 2018 | 12.0    | 4.93e-02        |
| 2016 | 2017 | -0.8    | 8.89e-01        |
| 2016 | 2018 | -2.0    | 7.38e-01        |
| 2017 | 2018 | -1.3    | 8.49e-01        |

**Table S5.** Pairwise yearly frequency comparison for *bla<sub>SHV</sub>* in the Nationwide database. The first two columns show the years whose frequencies are being compared. The third column shows the frequency difference, and the last column shows the *p*-value associated with the frequency difference. The asterisk (\*) indicate a statistically significant comparison after the False Discovery Rate controlling procedure ( $q^*=0.025$ ).

| Y1   | Y2   | FY1-FY2 | <i>p</i> -value |
|------|------|---------|-----------------|
| 2013 | 2014 | 12.2    | 1.72e-01        |
| 2013 | 2015 | -50.1   | 1.05e-02        |
| 2013 | 2016 | -2.8    | 8.64e-01        |
| 2013 | 2017 | -33.9   | 1.00e-01        |
| 2013 | 2018 | -33.3   | 1.09e-01        |
| 2014 | 2015 | -62.3   | 3.85e-39*       |
| 2014 | 2016 | -15.0   | 1.07e-05*       |
| 2014 | 2017 | -46.1   | 3.00e-24*       |
| 2014 | 2018 | -45.5   | 8.93e-22*       |
| 2015 | 2016 | 47.3    | 1.61e-23*       |
| 2015 | 2017 | 16.2    | 1.78e-04*       |

|      |      |       |           |
|------|------|-------|-----------|
| 2015 | 2018 | 16.8  | 5.10e-04* |
| 2016 | 2017 | -31.1 | 2.13e-11* |
| 2016 | 2018 | -30.5 | 1.21e-09* |
| 2017 | 2018 | 0.6   | 9.05e-01  |

**Table S6.** Pairwise yearly frequency comparison for *bla<sub>TEM</sub>* in the Nationwide database. The first two columns show the years whose frequencies are being compared. The third column shows the frequency difference, and the last column shows the *p*-value associated with the frequency difference. The asterisk (\*) indicate a statistically significant comparison after the False Discovery Rate controlling procedure ( $q^*=0.025$ ).

| Y1   | Y2   | FY1-FY2 | <i>p</i> -value |
|------|------|---------|-----------------|
| 2013 | 2014 | 0.7     | 9.67e-01        |
| 2013 | 2015 | 8.7     | 6.27e-01        |
| 2013 | 2016 | -1.4    | 9.25e-01        |
| 2013 | 2017 | 16.4    | 3.97e-01        |
| 2013 | 2018 | 16.5    | 3.98e-01        |
| 2014 | 2015 | 8.1     | 4.45e-02        |
| 2014 | 2016 | -2.1    | 5.93e-01        |
| 2014 | 2017 | 15.7    | 2.65e-04*       |
| 2014 | 2018 | 15.8    | 6.92e-04*       |
| 2015 | 2016 | -10.1   | 9.08e-03*       |
| 2015 | 2017 | 7.7     | 5.38e-02        |
| 2015 | 2018 | 7.8     | 8.13e-02        |
| 2016 | 2017 | 17.8    | 2.10e-05*       |
| 2016 | 2018 | 17.9    | 7.45e-05*       |
| 2017 | 2018 | 0.1     | 9.89e-01        |

**Table S7.** Pairwise yearly frequency comparison for *bla<sub>CTX-M</sub>* in the Nationwide database. The first two columns show the years whose frequencies are being compared. The third column shows the frequency difference, and the last column shows the *p*-value associated with the frequency difference. The asterisk (\*) indicate a statistically significant comparison after the False Discovery Rate controlling procedure ( $q^*=0.025$ ).

| Y1   | Y2   | FY1-FY2 | <i>p</i> -value |
|------|------|---------|-----------------|
| 2013 | 2014 | -14.0   | 3.25e-01        |
| 2013 | 2015 | -8.2    | 4.64e-01        |
| 2013 | 2016 | -16.8   | 2.72e-01        |
| 2013 | 2017 | -13.9   | 3.25e-01        |
| 2013 | 2018 | -22.3   | 1.92e-01        |
| 2014 | 2015 | 5.8     | 5.18e-02        |
| 2014 | 2016 | -2.9    | 4.45e-01        |
| 2014 | 2017 | 0.0     | 9.95e-01        |
| 2014 | 2018 | -8.3    | 4.43e-02        |
| 2015 | 2016 | -8.6    | 4.76e-03*       |
| 2015 | 2017 | -5.7    | 3.68e-02        |
| 2015 | 2018 | -14.1   | 3.19e-05*       |
| 2016 | 2017 | 2.9     | 4.01e-01        |
| 2016 | 2018 | -5.4    | 1.95e-01        |
| 2017 | 2018 | -8.3    | 2.73e-02        |

**Table S8.** Pairwise yearly frequency comparison for *bla<sub>OXA</sub>* in the Nationwide database. The first two columns show the years whose frequencies are being compared. The third column shows the frequency difference, and the last column shows the *p*-value associated with the frequency

difference. The asterisk (\*) indicate a statistically significant comparison after the False Discovery Rate controlling procedure ( $q^*=0.025$ ).

| Y1   | Y2   | FY1-FY2 | <i>p</i> -value |
|------|------|---------|-----------------|
| 2013 | 2014 | -16.8   | 2.73e-01        |
| 2013 | 2015 | -9.7    | 4.23e-01        |
| 2013 | 2016 | -13.2   | 3.41e-01        |
| 2013 | 2017 | -11.6   | 3.77e-01        |
| 2013 | 2018 | -18.7   | 2.42e-01        |
| 2014 | 2015 | 7.1     | 2.72e-02        |
| 2014 | 2016 | 3.6     | 3.32e-01        |
| 2014 | 2017 | 5.2     | 1.22e-01        |
| 2014 | 2018 | -1.9    | 6.41e-01        |
| 2015 | 2016 | -3.5    | 2.47e-01        |
| 2015 | 2017 | -1.9    | 4.93e-01        |
| 2015 | 2018 | -9.0    | 7.15e-03*       |
| 2016 | 2017 | 1.6     | 6.11e-01        |
| 2016 | 2018 | -5.5    | 1.54e-01        |
| 2017 | 2018 | -7.1    | 4.26e-02        |

**Table S9.** The Number of Clinical Isolates Each Year by State from the US Nationwide Database. N/A are clinical isolates with no location information.

| Year       | States (Number of Isolates)                                                                                                                                                                                                                                                                                            |
|------------|------------------------------------------------------------------------------------------------------------------------------------------------------------------------------------------------------------------------------------------------------------------------------------------------------------------------|
| 2013 (6)   | Missouri (4), Washington (2)                                                                                                                                                                                                                                                                                           |
| 2014 (179) | Washington (104), Pacific Northwest (43), Massachusetts (13), California (6), N/A (3), Texas (3), North Carolina (2), Illinois (1), Iowa (1), Maryland (1), Midwest (1), Oklahoma (1)                                                                                                                                  |
| 2015 (268) | N/A (157), Washington (69), California (19), Illinois (5), Minnesota (5), Virginia (5), Missouri (2), Connecticut (1), Kansas (1), Maryland (1), Massachusetts (1), Michigan (1), Oklahoma (1)                                                                                                                         |
| 2016 (190) | N/A (156), California (9), Texas (9), Minnesota (6), Virginia (5), Colorado (1), Massachusetts (1), Mississippi (1), New York (1), Pennsylvania (1)                                                                                                                                                                    |
| 2017 (251) | N/A (93), Massachusetts (51), Washington (26), New York (17), California (16), Pennsylvania (9), Minnesota (8), Missouri (8), Illinois (5), Texas (4), Connecticut (2), North Carolina (2), Puerto Rico (2), Colorado (1), Florida (1), Michigan (1), Mississippi (1), Montana (1), Nevada (1), Ohio (1), Virginia (1) |
| 2018 (166) | Missouri (45), Minnesota (37), Pennsylvania (33), California (23), Illinois (8), Maryland (5), Virginia (5), N/A (3), Wisconsin (2), Georgia (1), Massachusetts (1), New York (1), Tennessee (1), Texas (1)                                                                                                            |

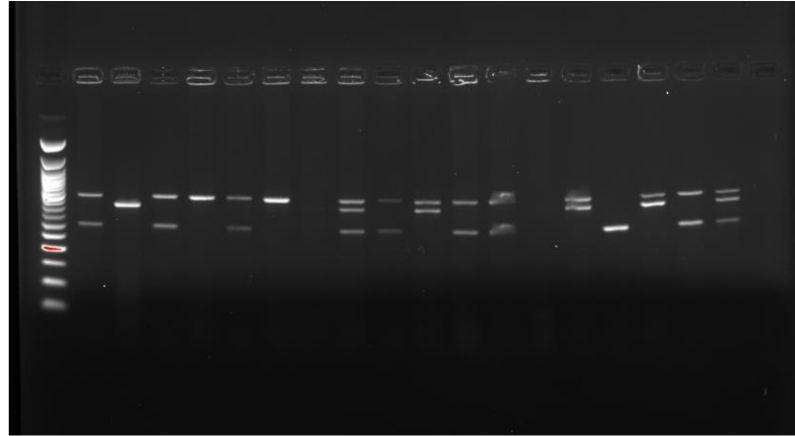

**Figure S1.** 2% agarose gel of *bla*<sub>CTX-M</sub>, *bla*<sub>TEM</sub>, and *bla*<sub>OXA</sub> PCR products. In lanes 2-18, isolates 337-372. Lane 19 is the positive control, isolate 389, and shows 3 bands at 482bp for *bla*<sub>CTX-M</sub>, 424bp for *bla*<sub>TEM</sub>, and 300bp for *bla*<sub>OXA</sub>. Lane 1 1kb NEB Ladder; Lane 2: 356, *E.coli* isolate positive for *bla*<sub>CTXM</sub> and *bla*<sub>OXA</sub>; Lane 3: 357, *E.coli* isolate positive for *bla*<sub>TEM</sub>; Lane 4: 358, *E.coli* isolate positive for *bla*<sub>CTXM</sub> and *bla*<sub>OXA</sub>; Lane 5: 359, *E.coli* isolate positive for *bla*<sub>CTXM</sub>; Lane 6: 360, *E.coli* isolate positive for *bla*<sub>CTXM</sub> and *bla*<sub>OXA</sub>; Lane 7: 36, *E.coli* isolate positive for *bla*<sub>CTXM</sub>; Lane 8: 362, *E.coli* isolate negative for *bla*<sub>CTX-M</sub>, *bla*<sub>TEM</sub>, and *bla*<sub>OXA</sub>; Lane 9: 363, *E.coli* isolate positive for *bla*<sub>CTXM</sub>, *bla*<sub>TEM</sub> and *bla*<sub>OXA</sub>; Lane 10: 364, *E.coli* isolate positive for *bla*<sub>CTXM</sub> and *bla*<sub>OXA</sub>; Lane 11: 365, *E.coli* isolate positive for *bla*<sub>CTXM</sub> and *bla*<sub>TEM</sub>; Lane 12: 366, *E.coli* isolate positive for *bla*<sub>CTXM</sub> and *bla*<sub>OXA</sub>; Lane 13: 367, *E.coli* isolate positive for *bla*<sub>CTXM</sub> and *bla*<sub>OXA</sub>; Lane 14: 368, *E.coli* isolate negative for *bla*<sub>CTX-M</sub>, *bla*<sub>TEM</sub>, and *bla*<sub>OXA</sub>; Lane 15: 369, *K. pneumoniae* isolate positive for *bla*<sub>CTXM</sub> and *bla*<sub>TEM</sub>; Lane 16: 370, *E.coli* isolate positive for *bla*<sub>OXA</sub>; Lane 17: 371, *E.coli* isolate positive for *bla*<sub>CTXM</sub> and *bla*<sub>TEM</sub>; *E.coli* isolate: Lane 19: Positive PCR control 389, *K. pneumoniae* isolate positive for *bla*<sub>CTX-M</sub>, *bla*<sub>TEM</sub>, and *bla*<sub>OXA</sub>; Lane 20: Negative PCR control, water.

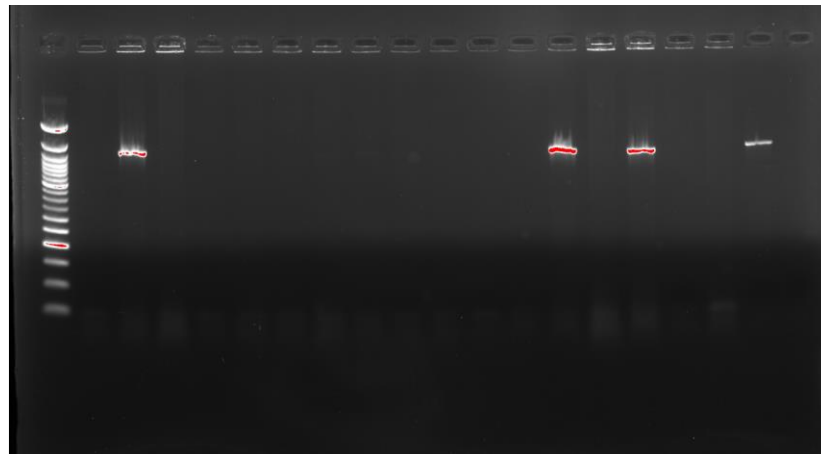

**Figure S2.** 2% agarose gel of *bla*<sub>SHV</sub> PCR products. In lanes 2-18, DHMMC isolates 561-564, 567-579. Lane 19 is the positive control, isolate 389, and shows a band at 813bp for *bla*<sub>SHV</sub>. Lane 1 1kb NEB Ladder; Lane 2: 561, *E.coli* isolate negative for *bla*<sub>SHV</sub>; Lane 3: 562, *E.coli* isolate positive for *bla*<sub>SHV</sub>; Lane 4: 563, *E.coli* isolate negative for *bla*<sub>SHV</sub>; Lane 5: 564, *E.coli* isolate negative for *bla*<sub>SHV</sub>; Lane 6: 567, *E.coli* isolate negative for *bla*<sub>SHV</sub>; Lane 7: 568, *E.coli* isolate negative for *bla*<sub>SHV</sub>; Lane 8: 569, *E.coli* isolate negative for *bla*<sub>SHV</sub>; Lane 9: 570, *E.coli* isolate negative for *bla*<sub>SHV</sub>; Lane 10: 571, *E.coli* isolate negative for *bla*<sub>SHV</sub>; Lane 11: 572, *E.coli* isolate negative for *bla*<sub>SHV</sub>; Lane 12: 573, *E.coli* isolate negative for *bla*<sub>SHV</sub>; Lane 13: 574, *E.coli* isolate negative for *bla*<sub>SHV</sub>; Lane 14: 575, *K. pneumoniae* isolate positive for *bla*<sub>SHV</sub>; Lane 15: 576, *E.coli* isolate negative for *bla*<sub>SHV</sub>; Lane 16: 577, *K. pneumoniae* positive for *bla*<sub>SHV</sub>; Lane 17: 578, *E.coli* isolate negative for *bla*<sub>SHV</sub>; Lane 18: 579, *E.coli* isolate negative for *bla*<sub>SHV</sub>; Lane 19: Positive PCR control 389, *K. pneumoniae* isolate positive for *bla*<sub>SHV</sub>; Lane 20: Negative PCR control, water.
